# Supplementary material
Source: ML conference proceedings conference paper supplement (https://openreview.net/forum?id=TmUfsLjI-1)
Supplement: supplementary_material [file attachment]

## A PRE-TRAINED MODEL DETAILS

We provide a detailed list of all the used pre-trained models together with the dimension of their representations, the number of parameters, and the achieved ImageNet test accuracy (for those that the accuracy is known), in the following tables.

Table 1: ImageNet Classification Models – All models are accessible by using the same prefix “<https://tfhub.dev/google/imagenet/>” in front of the model name.

| Model Name                            | Dim  | # Params   | ImageNet Accuracy |
|---------------------------------------|------|------------|-------------------|
| inception_v1/feature_vector/4         | 1024 | 5’592’624  | 0.698             |
| inception_v2/feature_vector/4         | 1024 | 10’153’336 | 0.739             |
| inception_v3/feature_vector/4         | 2048 | 21’768’352 | 0.78              |
| inception_resnet_v2/feature_vector/4  | 1536 | 54’276’192 | 0.804             |
| resnet_v1_50/feature_vector/4         | 2048 | 23’508’032 | 0.752             |
| resnet_v1_101/feature_vector/4        | 2048 | 42’500’160 | 0.764             |
| resnet_v1_152/feature_vector/4        | 2048 | 58’143’808 | 0.768             |
| resnet_v2_50/feature_vector/4         | 2048 | 23’519’360 | 0.756             |
| resnet_v2_101/feature_vector/4        | 2048 | 42’528’896 | 0.77              |
| resnet_v2_152/feature_vector/4        | 2048 | 58’187’904 | 0.778             |
| mobilenet_v1_100_224/feature_vector/4 | 1024 | 3’206’976  | 0.709             |
| mobilenet_v2_100_224/feature_vector/4 | 1280 | 2’223’872  | 0.718             |
| nasnet_mobile/feature_vector/4        | 1056 | 4’232’978  | 0.74              |
| nasnet_large/feature_vector/4         | 4032 | 84’720’150 | 0.827             |
| pnasnet_large/feature_vector/4        | 4320 | 81’736’668 | 0.829             |

Table 2: Expert Models – The model name indicates the subset of JFT on which each model was trained (Puigcerver et al., 2020).

| Model (Subset)       | Dim  | # Params   |
|----------------------|------|------------|
| Mode of transport    | 2048 | 23’807’702 |
| Geographical feature | 2048 | 23’807’702 |
| Structure            | 2048 | 23’807’702 |
| Mammal               | 2048 | 23’807’702 |
| Plant                | 2048 | 23’807’702 |
| Material             | 2048 | 23’807’702 |
| Home & garden        | 2048 | 23’807’702 |
| Flowering plant      | 2048 | 23’807’702 |
| Sports equipment     | 2048 | 23’807’702 |
| Dish                 | 2048 | 23’807’702 |
| Textile              | 2048 | 23’807’702 |
| Shoe                 | 2048 | 23’807’702 |
| Bag                  | 2048 | 23’807’702 |
| Paper                | 2048 | 23’807’702 |
| Snow                 | 2048 | 23’807’702 |
| <i>Full JFT</i>      | 2048 | 23’807’702 |

Table 3: VTAB Benchmark Models – All models are accessible by using the model name and the prefix “<https://tfhub.dev/vtab/>”.

| Model Name                | Dim  | # Params   |
|---------------------------|------|------------|
| sup-100/1                 | 2048 | 23’500’352 |
| rotation/1                | 2048 | 23’500’352 |
| exemplar/1                | 2048 | 23’500’352 |
| relative-patch-location/1 | 2048 | 23’500’352 |
| jigsaw/1                  | 2048 | 23’500’352 |
| semi-rotation-10/1        | 2048 | 23’500’352 |
| sup-rotation-100/1        | 2048 | 23’500’352 |
| semi-exemplar-10/1        | 2048 | 23’500’352 |
| sup-exemplar-100/1        | 2048 | 23’500’352 |
| cond-biggan/1             | 1536 | 86’444’833 |
| uncond-biggan/1           | 1536 | 86’444’833 |
| wae-mmd/1                 | 128  | 23’779’136 |
| wae-gan/1                 | 128  | 23’779’136 |
| wae-ukl/1                 | 128  | 23’779’136 |
| vae/1                     | 128  | 23’779’136 |

## B LIMITATION OF CORRELATION AS EVALUATION SCORE

Previous works follow an approach that performs a correlation analysis on choosing which model to transfer based on a ranking across the models (Kornblith et al., 2019; Meiseles & Rokach, 2020). We claim that this is not a suitable score in our setting of heterogenous pools, and in this section we explain the arguments in more details. We provide a simple example in which a correlation analysis fails compared to our notion of regret, which we see as an intuitive notion of failure in this setting.

We start by outlining two obvious dependencies between the two variants:

- Having a perfect correlation (equal to 1) results in zero regret,
- Having zero regret does not necessarily imply a perfect correlation.

The first statement follows by definition, whereas the second statement is justified by the following example: suppose that all models perform identically in terms of the fine-tune accuracy. In this case, every attribute (e.g. proxy task value, or ImageNet accuracy) would yield no correlation with respect to the fine-tune accuracy, although there is clearly zero regret for every imaginable strategy.

**Implications.** If we have a large pool of models with some outlier models that clearly outperform the others, which are of similar fine-tune accuracy, a search strategy should return one of those *better* model, otherwise it will suffer from a large regret. On the other hand, this setting would usually have no rank nor linear correlation following the reasoning from before. If we restrict the same pool to models performing similarly, it will remain uncorrelated, but every search strategy will result in zero regret. The same scenario holds if single outliers are performing worse than all other models. Both cases are seen often in practice, especially for model pools containing experts. We highlight some examples of this phenomena in Figures 8 and 9, together with some that have positive correlation.

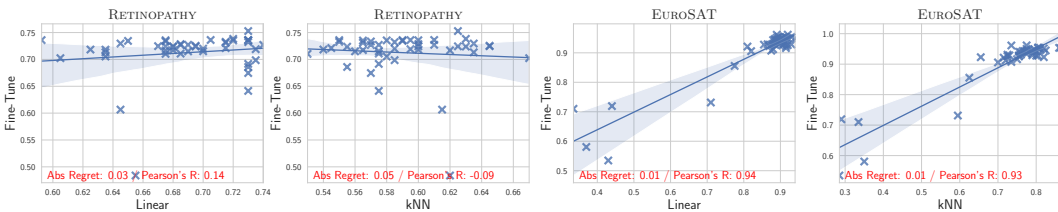

Figure 8: Example correlation values for pool ALL.

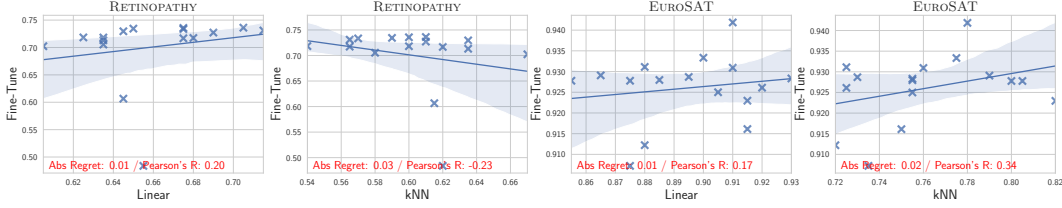

Figure 9: Example correlation values for pool EXPERT.

## C LOG-ODDS FOR THE EVALUATION SCORE

Following Kornblith et al. (2019), we analyze a notion that differs from our definition of relative regret and delta between two strategies (cf. Equation 2 and Section 3). The idea is to compare two search strategies  $m_1$  and  $m_2$  by calculating the difference between  $\text{logit}(s(m_1))$  and  $\text{logit}(s(m_2))$  (the expected maximal logit-transformed test accuracy achieved by any model in the sets returned for both search strategies). The logit transform is defined as  $\text{logit}(p) = \log(p/(1-p)) = \text{sigmoid}^{-1}(p)$ , also known as the log-odds of  $p$ . This transformation leads to the next definition of *log-odds delta*:

$$\tilde{\Delta}(m_1, m_2) := \log \left( \frac{s(m_1) - s(m_2)}{1 - \min(s(m_1), s(m_2))} \right). \quad (3)$$

Substituting  $s(m_1)$  by the ORACLE value from Equation 1 in Section 3, and  $s(m_2)$  by  $s(m)$  leads to a new definition of *log-odds regret*  $\tilde{r}(m)$ .

These definitions are also incorporating the dataset difficulty and yield results very similar to our definition of the relative delta and relative regret in Section 3. We now provide the analogous plots of the ones given in the main body of the paper, with the log-odds regret and log-odds delta instead of the relative regret and relative delta. We highlight the fact that, beside the change of the scale on the y-axis, all the findings given in the main body of the paper hold.

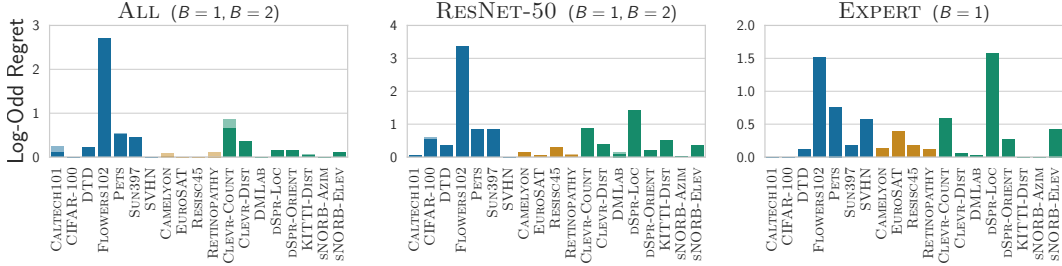Figure 10: Log-odds regret ( $\tilde{r}(m)$ ) with  $B = 1$  (transparent) and  $B = 2$  (solid) for the task-agnostic model search strategy.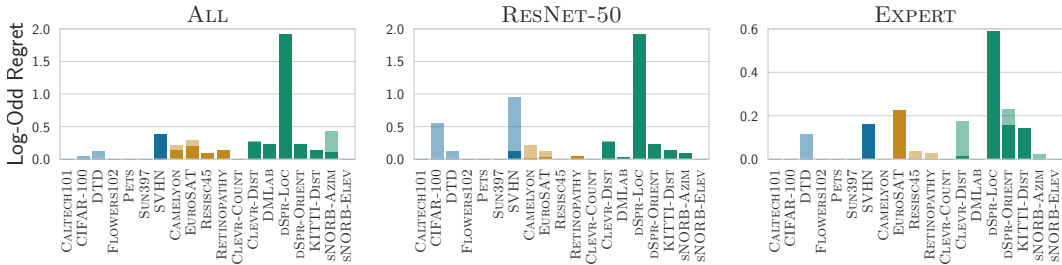Figure 11: Log-odds regret ( $\tilde{r}(m)$ ) for  $B = 1$  (transparent) and  $B = 2$  (solid) for the task-aware (linear) model search strategy.

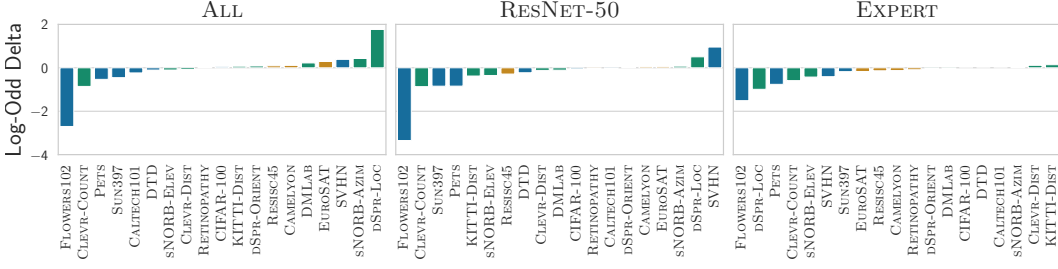

Figure 12: Log-odds delta ( $\hat{\Delta}(m_1, m_2)$ ) between task-agnostic (positive if better) and Task-aware (linear) (negative if better) for  $B = 1$ .

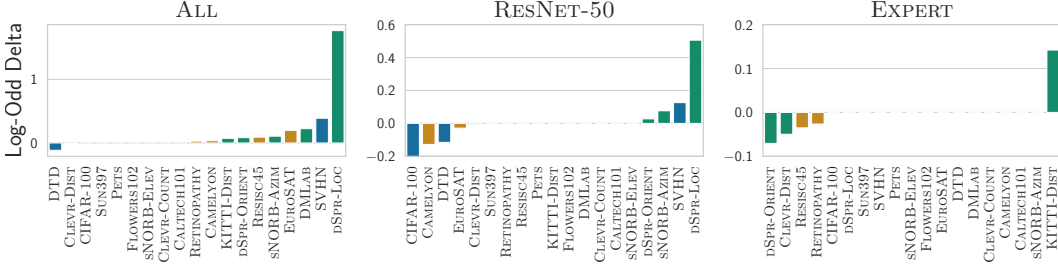

Figure 13: Log-odds delta ( $\hat{\Delta}(m_1, m_2)$ ) between hybrid linear (positive if better) and linear evaluation (negative if better) for  $B = 2$ .

## D ANALYSIS FOR OTHER POOLS.

In this sections we provide the plots and an analysis for the DIM2048 and IMNETACCURACIES pools, both omitted from the main body of the paper.

We start by emphasizing that the results between the DIM2048 and the RESNET-50 pool, used in the main body of the paper, do not vary significantly. Most notably, the hybrid linear strategy is on par with the task-aware method, whereas the task-agnostic method suffers from high regret due to the lack of ability to pick expert models.

When examining the performance of all strategies on the IMNETACCURACIES pool, presented in Figure 14 (right), Figure 15 (right) and Figure 16 (right), we observe that the task-agnostic strategy is able to pick the optimal model for 12 out of 19 datasets for  $B = 1$ , and as many as 17 out of 19 for  $B = 2$ . This clearly confirms the claim made by Kornblith et al. (2019) that *better ImageNet models transfer better*. More surprisingly, we observe that both task-aware strategies (linear and  $k$ NN) fail consistently and, hence, result in high regret when being restricted to the IMNETACCURACIES pool only (cf. Figures 15 and 16).

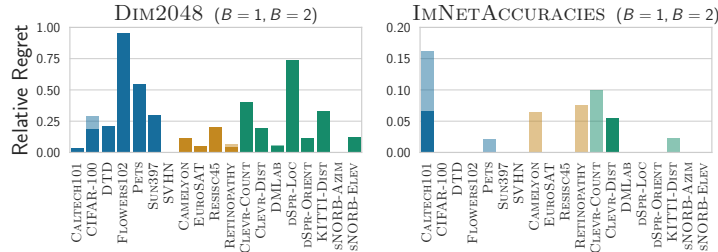

Figure 14: Relative regret for the task-agnostic search strategy with  $B = 1$  (transparent) and  $B = 2$  (solid) on the pools DIM2048 and IMNETACCURACIES.

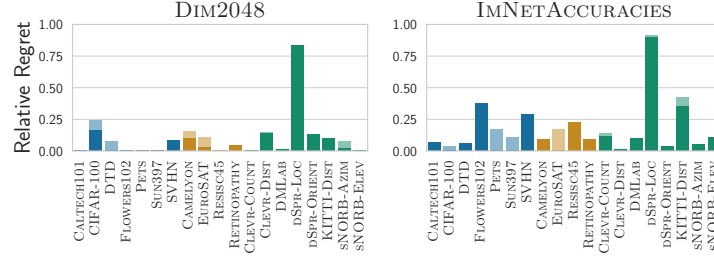

Figure 15: Relative regret for the task-aware (linear) search strategy with  $B = 1$  (transparent) and  $B = 2$  (solid) on the pools DIM2048 and IMNETACCURACIES.

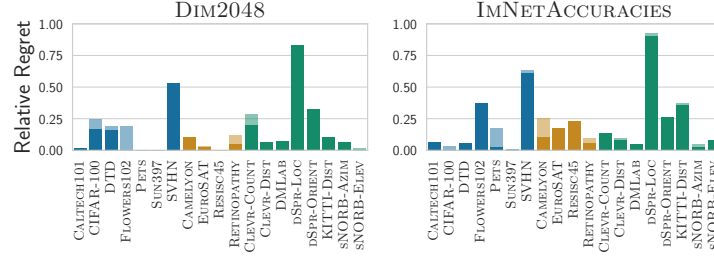

Figure 16: Relative regret for the task-aware ( $k$ NN) search strategy with  $B = 1$  (transparent) and  $B = 2$  (solid) on the pools DIM2048 and IMNETACCURACIES.

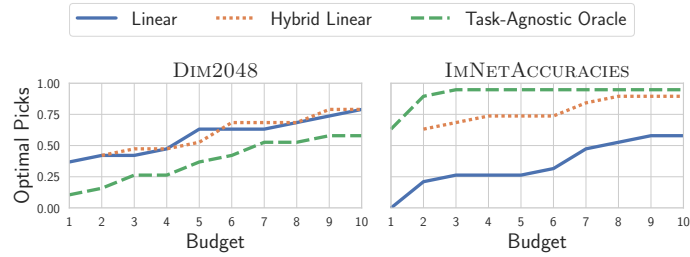

Figure 17: Optimal picks for an increasing budget on DIM2048 and IMNETACCURACIES.

## E $k$ NN AS A TASK-AWARE PROXY

In this section, we analyze the impact of choosing the  $k$ NN classifier accuracy as the choice for the proxy task, compared to the linear classifier accuracy described in the main body of the paper. In practice,  $k$ NN might be favorable to a user since calculating the  $k$ NN classifier accuracy with respect to a relatively small test set can be orders of magnitude faster compared to training a linear classifier, which might be sensitive to the choice of optimal hyper-parameters. A theoretical and empirical analysis of the computing performance of these two proxies is out of the scope of this work, as we are mainly interested in the comparison in terms of the model-search capability of either of these. In general, the major claims on the performance of linear as a task-aware strategy also apply to  $k$ NN. The latter also mainly fails on structured datasets across all pools, as visible in Figure 18. Similarly to the linear task,  $k$ NN is on par with the task-agnostic strategy on the ALL pool, but clearly outperforms it on the RESNET-50 and EXPERT pools, as visible in Figure 19. By further comparing  $k$ NN to the linear proxy task, we realize that  $k$ NN performs worse than linear on half of the datasets across the three different dataset groups, whilst being on par with it on the other half (cf. Figure 20). Finally, by choosing  $k$ NN as the task-aware part for the hybrid strategy and comparing it to the task-aware ( $k$ NN) strategy with a budget of  $B = 2$  in Figure 21, we see an increase of performance on the ALL pool, no clear winner on the restricted RESNET-50 pool, but higher regret on the EXPERT pool. Unsurprisingly, this version of hybrid strategy also performs slightly worse compared than the one with a linear proxy across all the pools (cf. Figure 22).

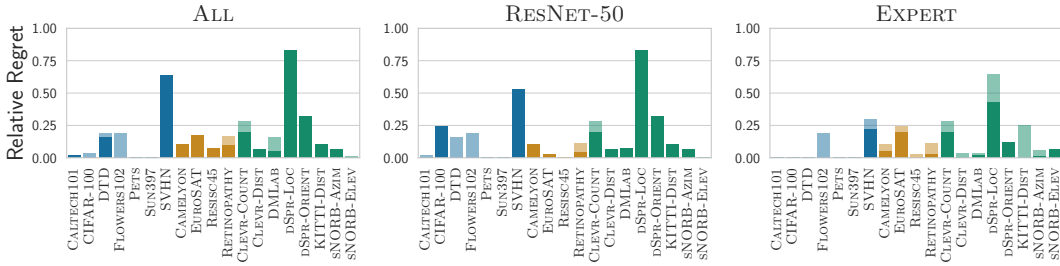

Figure 18: Relative regret for the  $k$ NN search strategy with  $B = 1$  (transparent) and  $B = 2$  (solid).

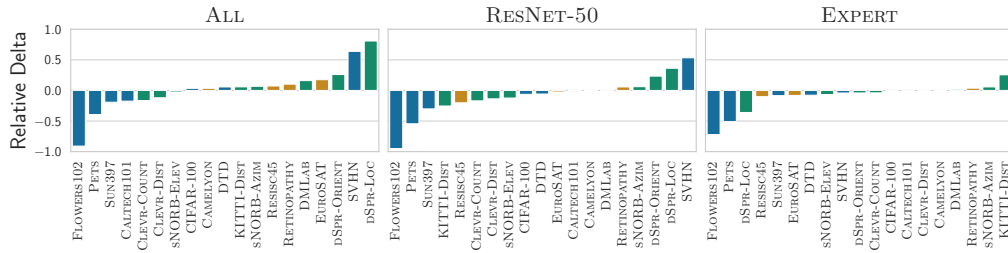

Figure 19: Relative delta between the task-agnostic (positive if better) and the  $k$ NN task-aware search strategy (negative if better) for  $B = 1$ .

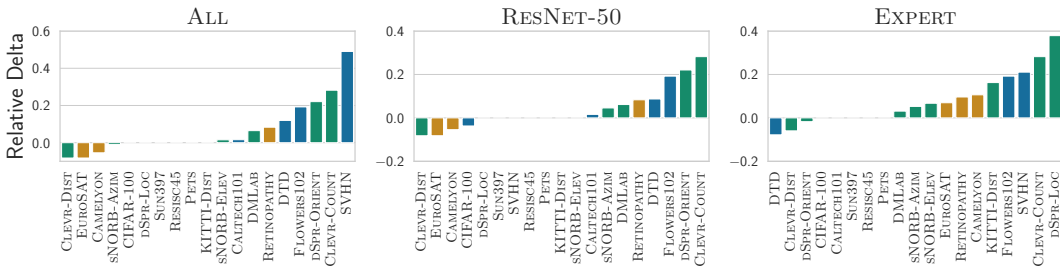

Figure 20: Relative delta between the linear (positive if better) and the  $k$ NN task-aware search strategy (negative if better) for  $B = 1$ .

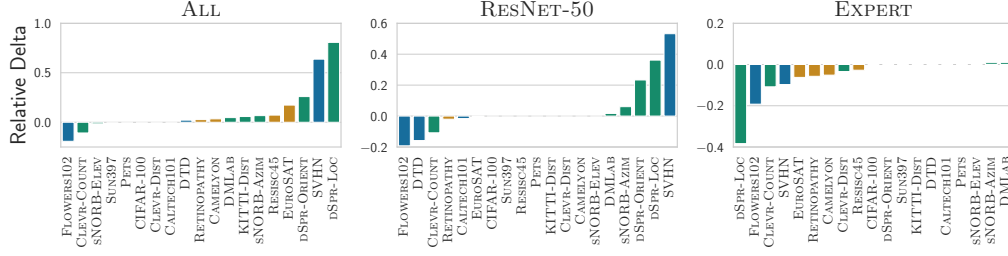

Figure 21: Relative delta between the hybrid kNN (positive if better) and kNN search strategy (negative if better) for  $B = 2$ .

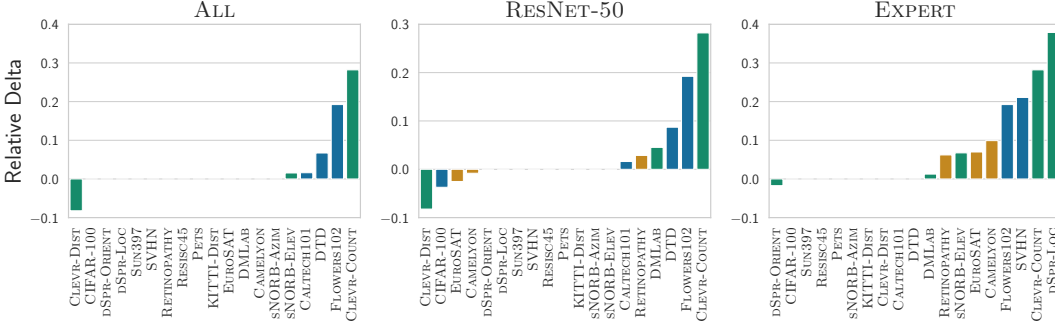

Figure 22: Relative delta between the hybrid Linear (positive if better) and hybrid kNN search strategy (negative if better) for  $B = 2$ .

## F ON THE IMPACT OF THE DIMENSION ON $k$ NN

As described in Section 5.4, in this section we show that there is no significant correlation (positive or negative) between the  $k$ NN classifier accuracy and the dimension of the representation that it is evaluated on. We see this by running a linear correlation analysis between the dimension of the each representation and the achieved  $k$ NN classifier accuracy. In order to have a single point for each possible dimension, and to avoid an over-representation of the expert models, which have all the same dimension, for each dimension we selected the model that achieves the highest  $k$ NN accuracy. We do this for all pairs of dimensions and datasets. In Figure 23 we present three hand-picked datasets that achieve (a) the highest anti-correlation value, (b) the lowest absolute correlation value, and (c) the highest correlation value.

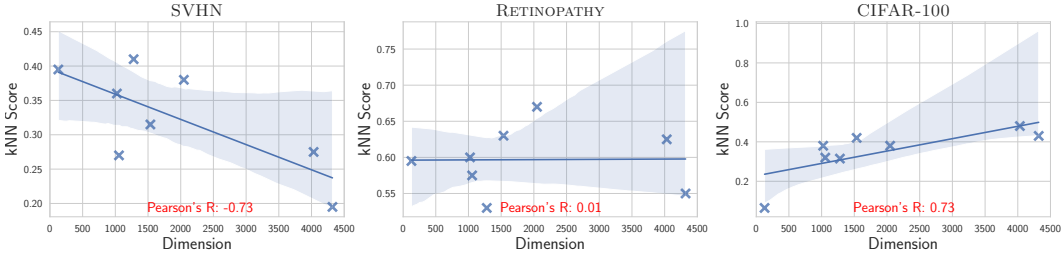

Figure 23: Three examples of datasets in which the analysis of the dimension of the representation compared to the resulting  $k$ NN scores results in a negative correlation (**left**), no correlation at all (**middle**), and a positive correlation (**right**).

## G BUDGET PER METHOD

In this section, we display the budget each method requires in order to achieve zero regret per pool. Notice that the strategy “Oracle” refers to the task-agnostic oracle which ranks models based on their achieved average accuracy over all datasets. Even though this is not practical, it enables us to have a task-agnostic method that is able to achieve zero regret eventually as every model (even experts) is included in this ranking. We split the results by the dataset types and notice that there are some clear patterns between a pool, a dataset type and the required budget for task-aware or task-agnostic methods. For instance, one observes that the linear strategy performs well on all the natural datasets across all the pools except IMNETACCURACIES. Structured and specialized datasets seem to be harder for this proxy task, except for the EXPERT pool. Finally,  $k$ NN consistently performs slightly worse than the linear proxy across all pools.

Table 4: Budget required to achieve zero regret per dataset and strategy on the pools ALL, RESNET-50 and EXPERT.

| Dataset       | Oracle | ALL    |     | RESNET-50 |        |     | EXPERT |        |     |
|---------------|--------|--------|-----|-----------|--------|-----|--------|--------|-----|
|               |        | Linear | kNN | Oracle    | Linear | kNN | Oracle | Linear | kNN |
| CALTECH101 ●  | 5      | 1      | 4   | 3         | 1      | 2   | 1      | 1      | 1   |
| CIFAR-100 ●   | 1      | 2      | 2   | 1         | 2      | 6   | 1      | 1      | 1   |
| DTD ●         | 9      | 2      | 3   | 6         | 2      | 2   | 3      | 2      | 1   |
| FLOWERS102 ●  | 26     | 1      | 2   | 20        | 1      | 2   | 11     | 1      | 2   |
| PETS ●        | 13     | 1      | 1   | 9         | 1      | 1   | 5      | 1      | 1   |
| SUN397 ●      | 7      | 1      | 1   | 5         | 1      | 1   | 2      | 1      | 1   |
| SVHN ●        | 1      | 23     | 37  | 2         | 9      | 13  | 15     | 13     | 15  |
| CAMELYON ●    | 23     | 5      | 9   | 17        | 4      | 8   | 9      | 1      | 4   |
| EUROSAT ●     | 1      | 4      | 19  | 14        | 16     | 7   | 4      | 5      | 5   |
| RESISC45 ●    | 1      | 35     | 34  | 3         | 1      | 1   | 2      | 2      | 2   |
| RETINOPATHY ● | 2      | 4      | 8   | 23        | 14     | 9   | 12     | 2      | 7   |
| CLEVR-COUNT ● | 7      | 1      | 10  | 5         | 1      | 9   | 2      | 1      | 6   |
| CLEVR-DIST ●  | 44     | 5      | 4   | 35        | 5      | 4   | 10     | 6      | 2   |
| DMLAB ●       | 1      | 18     | 29  | 3         | 8      | 4   | 7      | 1      | 6   |
| dSPR-LOC ●    | 9      | 25     | 21  | 6         | 19     | 17  | 3      | 3      | 4   |
| dSPR-ORIENT ● | 30     | 9      | 21  | 23        | 8      | 19  | 12     | 5      | 12  |
| KITTI-DIST ●  | 3      | 8      | 14  | 1         | 7      | 10  | 1      | 3      | 2   |
| sNORB-AZIM ●  | 1      | 45     | 25  | 32        | 3      | 5   | 1      | 2      | 15  |
| sNORB-ELEV ●  | 37     | 1      | 2   | 30        | 1      | 1   | 12     | 1      | 5   |



Table 5: Budget required to achieve zero regret per dataset and strategy on the pools DIM2048 and IMNETACCURACIES.

| Dataset       | DIM2048 |        |     | IMNETACCURACIES |        |    |
|---------------|---------|--------|-----|-----------------|--------|----|
|               | Oracle  | Linear | kNN | Oracle          | Linear |    |
| CALTECH101 ●  | 3       | 1      | 4   | 3               | 7      | 12 |
| CIFAR-100 ●   | 1       | 5      | 10  | 1               | 2      | 2  |
| DTD ●         | 7       | 2      | 3   | 2               | 7      | 9  |
| FLOWERS102 ●  | 24      | 1      | 2   | 1               | 14     | 15 |
| PETS ●        | 11      | 1      | 1   | 2               | 2      | 3  |
| SUN397 ●      | 5       | 1      | 1   | 1               | 2      | 2  |
| SVHN ●        | 2       | 12     | 15  | 1               | 14     | 15 |
| CAMELYON ●    | 21      | 5      | 9   | 2               | 7      | 8  |
| EUROSAT ●     | 17      | 21     | 8   | 1               | 2      | 8  |
| RESISC45 ●    | 3       | 1      | 1   | 1               | 14     | 14 |
| RETINOPATHY ● | 6       | 12     | 6   | 2               | 3      | 4  |
| CLEVR-COUNT ● | 5       | 1      | 10  | 2               | 12     | 12 |
| CLEVR-DIST ●  | 42      | 5      | 4   | 14              | 6      | 4  |
| DMLAB ●       | 9       | 10     | 8   | 1               | 9      | 12 |
| DSpr-LOC ●    | 7       | 25     | 21  | 1               | 15     | 13 |
| DSpr-ORIENT ● | 28      | 9      | 21  | 1               | 8      | 12 |
| KITTI-DIST ●  | 1       | 8      | 13  | 2               | 13     | 15 |
| SNORB-AZIM ●  | 37      | 4      | 7   | 1               | 14     | 9  |
| SNORB-ELEV ●  | 35      | 1      | 2   | 1               | 15     | 15 |

## H ALL FINE-TUNE ACCURACIES AND PICKED MODELS

Finally, we provide plots that summarize all the results of the conducted large-scale experiment in a single overview per pool. The plots highlight the range of test accuracies amongst all the fine-tuned models, as well as the returned top-1 models ( $B = 1$ ) for the three strategies – task-agnostic, task-aware linear and task-aware  $k$ NN.

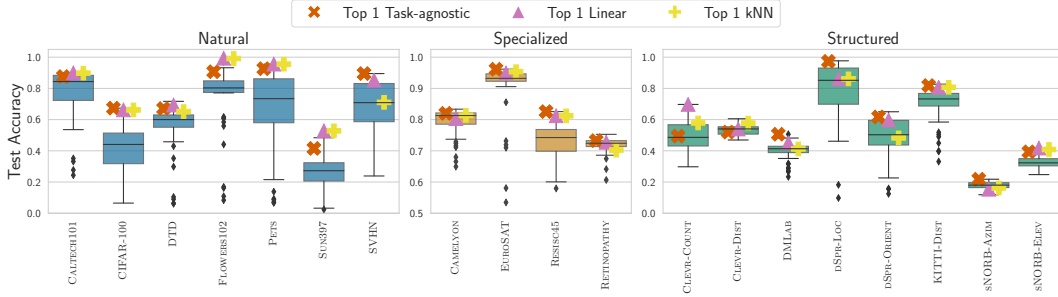

Figure 24: Pool ALL.

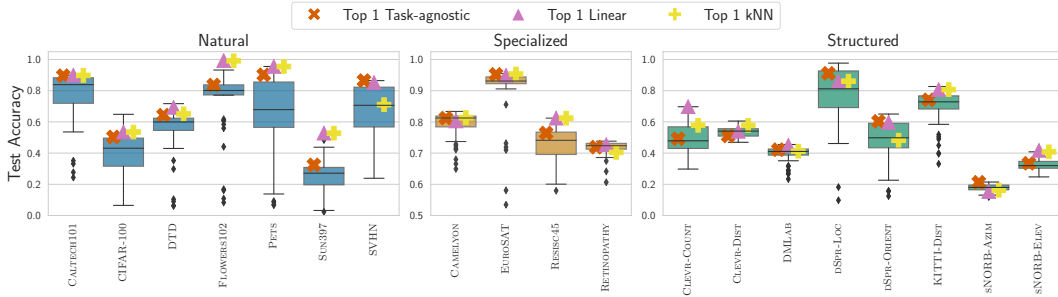

Figure 25: Pool DIM2048.

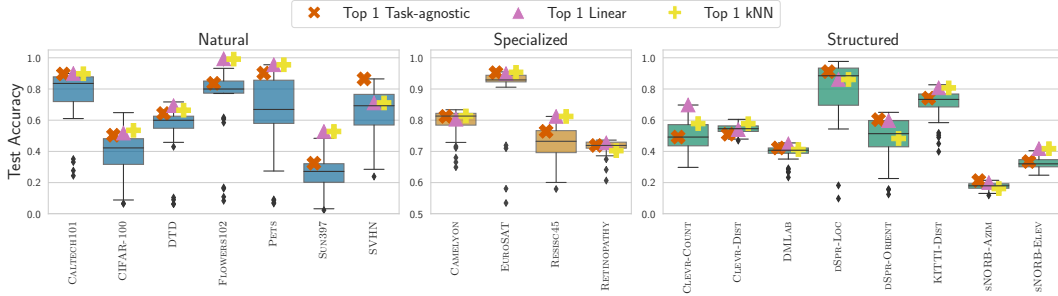

Figure 26: Pool RESNET-50.

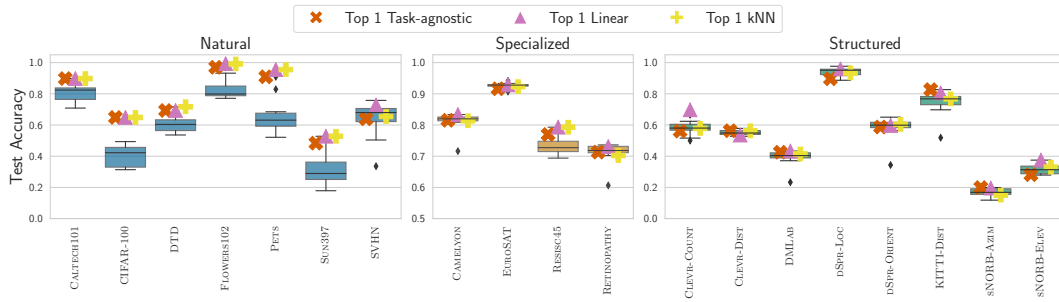

Figure 27: Pool EXPERT.

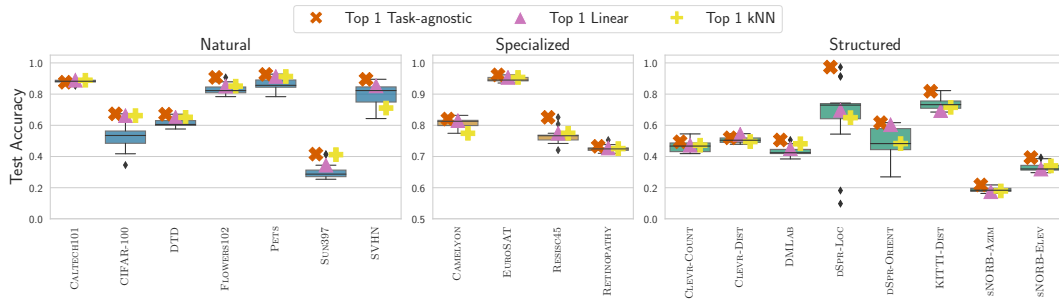

Figure 28: Pool IMNETACCURACIES.
